# Supplementary material for: Gastric microbiome in horses with and without equine glandular gastric disease
Source: PubMed Central journal article supplement — J Vet Intern Med. 2021 Aug 5;35(5):2458–64. doi: 10.1111/jvim.16241 (PMC8478018; doi:10.1111/jvim.16241), 2021-08-05
Supplement: JVIM-35-2458-s001.pdf [file JVIM-35-2458-s001.pdf]

**Supplementary Table 1**

Number of samples included from each horse.

| Horse | Age | Breed | Sex | EGGD Score | EGGD 0 -BX | NORM-BX | HYPER-BX | LESION-BX | Gastric Fluid |
|-------|-----|-------|-----|------------|------------|---------|----------|-----------|---------------|
| 1     | 13  | TB    | G   | 0          | 2          | -       | -        | -         | Yes           |
| 2     | 12  | TB    | M   | 0          | 1          | -       | -        | -         | Yes           |
| 3     | 10  | TB    | G   | 0          | 2          | -       | -        | -         | Yes           |
| 4     | 9   | WB    | M   | 0          | 2          | -       | -        | -         | No            |
| 5     | 4   | TB    | G   | 0          | 2          | -       | -        | -         | No            |
| 6     | 6   | TB    | G   | 0          | 0          | -       | -        | -         | Yes           |
| 7     | 12  | TB    | M   | 1          | -          | 2       | 0        | -         | No            |
| 8     | 16  | TB    | M   | 1          | -          | 3       | 3        | -         | No            |
| 9     | 12  | QH    | M   | 1          | -          | 1       | 0        | -         | No            |
| 10    | 13  | TB    | G   | 1          | -          | 2       | 2        | -         | Yes           |
| 11    | 8   | TB    | G   | 1          | -          | 3       | 2        | -         | Yes           |
| 12    | 5   | TB    | M   | 1          | -          | 2       | 3        | -         | Yes           |
| 13    | 8   | Arab  | M   | 1          | -          | 1       | 3        | -         | No            |
| 14    | 12  | QH    | G   | 1          | -          | 2       | 3        | -         | Yes           |
| 15    | 18  | TB    | M   | 2          | -          | 1       | 0        | 3         | No            |
| 16    | 16  | TB    | G   | 2          | -          | 2       | 1        | 1         | No            |
| 17    | 13  | TB    | M   | 2          | -          | 1       | 3        | 2         | No            |
| 18    | 17  | QH    | G   | 2          | -          | 2       | 0        | 3         | Yes           |
| 19    | 7   | TB    | G   | 2          | -          | 2       | 1        | 2         | Yes           |
| 20    | 6   | TB    | G   | 2          | -          | 2       | 3        | 3         | No            |
| 21    | 9   | TB    | G   | 2          | -          | 0       | 0        | 4         | No            |
| 22    | 7   | TB    | G   | 2          | -          | 1       | 1        | 2         | No            |
| 23    | 6   | TB    | G   | 2          | -          | 2       | 0        | 1         | Yes           |
| 24    | 17  | TB    | M   | 3          | -          | 3       | 0        | 4         | No            |

Age: reported in years; Breed: TB = Thoroughbred, WB = Warmblood, QH = Quarter Horse, Arab = Arabian;  
Sex: G = gelding; M = mare
